# Supplementary material
Source: Springer Nature journal article supplement (https://www.springermedizin.de/resource/supplementary/13099_2012_79_MOESM1_ESM.pdf/9665482)
Supplement: MOESM1 [file 9665482]

## Additional file 1

Details of the samples tested in this study and their results.

| <b>Sample Type</b> | <b>ID</b> | <b>Date</b> | <b>Result</b> | <b>Additional Information</b>       |
|--------------------|-----------|-------------|---------------|-------------------------------------|
| Chicken<br>Caeca   | 002       | 26/01/12    | Negative      | Poultry processing plant, co. Cavan |
|                    | 003       | 26/01/12    | Negative      | Poultry processing plant, co. Cavan |
|                    | 004       | 26/01/12    | Negative      | Poultry processing plant, co. Cavan |
|                    | 005       | 26/01/12    | Negative      | Poultry processing plant, co. Cavan |
|                    | 006       | 26/01/12    | Negative      | Poultry processing plant, co. Cavan |
|                    | 007       | 26/01/12    | Negative      | Poultry processing plant, co. Cavan |
|                    | 008       | 26/01/12    | Negative      | Poultry processing plant, co. Cavan |
|                    | 009       | 26/01/12    | Negative      | Poultry processing plant, co. Cavan |
|                    | 010       | 26/01/12    | Negative      | Poultry processing plant, co. Cavan |
|                    | 011       | 03/02/12    | Negative      | Poultry processing plant, co. Cavan |
|                    | 012       | 03/02/12    | Negative      | Poultry processing plant, co. Cavan |
|                    | 013       | 03/02/12    | Negative      | Poultry processing plant, co. Cavan |
|                    | 014       | 03/02/12    | Negative      | Poultry processing plant, co. Cavan |
|                    | 015       | 03/02/12    | Negative      | Poultry processing plant, co. Cavan |
|                    | 016       | 03/02/12    | Negative      | Poultry processing plant, co. Cavan |
|                    | 017       | 03/02/12    | Negative      | Poultry processing plant, co. Cavan |
|                    | 018       | 03/02/12    | Negative      | Poultry processing plant, co. Cavan |
|                    | 019       | 03/02/12    | Negative      | Poultry processing plant, co. Cavan |
|                    | 020       | 03/02/12    | Negative      | Poultry processing plant, co. Cavan |
|                    | 021       | 08/02/12    | Negative      | Poultry processing plant, co. Cavan |
|                    | 022       | 08/02/12    | Negative      | Poultry processing plant, co. Cavan |
|                    | 023       | 08/02/12    | Negative      | Poultry processing plant, co. Cavan |
|                    | 024       | 08/02/12    | Negative      | Poultry processing plant, co. Cavan |
|                    | 025       | 08/02/12    | Negative      | Poultry processing plant, co. Cavan |
|                    | 026       | 08/02/12    | Negative      | Poultry processing plant, co. Cavan |
|                    | 027       | 08/02/12    | Negative      | Poultry processing plant, co. Cavan |
|                    | 028       | 08/02/12    | Negative      | Poultry processing plant, co. Cavan |
|                    | 029       | 08/02/12    | Negative      | Poultry processing plant, co. Cavan |
|                    | 030       | 08/02/12    | Negative      | Poultry processing plant, co. Cavan |
|                    | 031       | 08/02/12    | Negative      | Poultry processing plant, co. Cavan |
|                    | 032       | 08/02/12    | Negative      | Poultry processing plant, co. Cavan |
|                    | 033       | 08/02/12    | Negative      | Poultry processing plant, co. Cavan |
|                    | 034       | 08/02/12    | Negative      | Poultry processing plant, co. Cavan |
|                    | 035       | 08/02/12    | Negative      | Poultry processing plant, co. Cavan |
|                    | 036       | 08/02/12    | Negative      | Poultry processing plant, co. Cavan |
|                    | 037       | 08/02/12    | Negative      | Poultry processing plant, co. Cavan |
|                    | 038       | 08/02/12    | Negative      | Poultry processing plant, co. Cavan |
|                    | 039       | 08/02/12    | Negative      | Poultry processing plant, co. Cavan |

|               |                  |                 |                                 |                                     |
|---------------|------------------|-----------------|---------------------------------|-------------------------------------|
|               | 040              | 08/02/12        | Negative                        | Poultry processing plant, co. Cavan |
| Chicken wings | 001              | 14/02/12        | Negative                        | Poultry processing plant, co. Cavan |
|               | 002              | 14/02/12        | Negative                        | Poultry processing plant, co. Cavan |
|               | 003              | 14/02/12        | Negative                        | Poultry processing plant, co. Cavan |
|               | 004              | 14/02/12        | Negative                        | Poultry processing plant, co. Cavan |
|               | 005              | 14/02/12        | Negative                        | Poultry processing plant, co. Cavan |
|               | 006              | 14/02/12        | Negative                        | Poultry processing plant, co. Cavan |
|               | 007              | 14/02/12        | Negative                        | Poultry processing plant, co. Cavan |
|               | 008              | 14/02/12        | Negative                        | Poultry processing plant, co. Cavan |
|               | 009              | 14/02/12        | Negative                        | Poultry processing plant, co. Cavan |
|               | 010              | 14/02/12        | Negative                        | Poultry processing plant, co. Cavan |
|               | 011              | 14/02/12        | Negative                        | Poultry processing plant, co. Cavan |
|               | 012              | 14/02/12        | Negative                        | Poultry processing plant, co. Cavan |
|               | 013              | 14/02/12        | Negative                        | Poultry processing plant, co. Cavan |
|               | 014              | 14/02/12        | Negative                        | Poultry processing plant, co. Cavan |
|               | 015              | 14/02/12        | Negative                        | Poultry processing plant, co. Cavan |
|               | 016              | 14/02/12        | Negative                        | Poultry processing plant, co. Cavan |
|               | 017              | 14/02/12        | Negative                        | Poultry processing plant, co. Cavan |
|               | 018              | 14/02/12        | Negative                        | Poultry processing plant, co. Cavan |
|               | 019              | 14/02/12        | Negative                        | Poultry processing plant, co. Cavan |
|               | 020              | 14/02/12        | Negative                        | Poultry processing plant, co. Cavan |
| Bovine faeces | 821              | 19/04/12        | Negative                        | Herd 1, Southern Ireland            |
|               | 867              | 19/04/12        | Negative                        | Herd 1, Southern Ireland            |
|               | 805              | 19/04/12        | Negative                        | Herd 1, Southern Ireland            |
|               | 001              | 20/04/12        | Negative                        | Herd 2, Southern Ireland            |
|               | 002              | 20/04/12        | Negative                        | Herd 2, Southern Ireland            |
|               | 003              | 20/04/12        | Negative                        | Herd 2, Southern Ireland            |
|               | 119              | 26/04/12        | Negative                        | Herd 1, Southern Ireland            |
|               | 768              | 26/04/12        | Negative                        | Herd 1, Southern Ireland            |
|               | 766              | 26/04/12        | Negative                        | Herd 1, Southern Ireland            |
|               | 673              | 26/04/12        | Negative                        | Herd 1, Southern Ireland            |
|               | 970 <sup>a</sup> | 26/04/12        | PCR Inhibited                   | Herd 1, Southern Ireland            |
|               | 491 <sup>a</sup> | 10/05/12        | PCR Inhibited                   | Herd 2, Southern Ireland            |
|               | 960              | 10/05/12        | Negative                        | Herd 1, Southern Ireland            |
|               | 713              | 10/05/12        | Negative                        | Herd 1, Southern Ireland            |
|               | 971              | 11/05/12        | Negative                        | Herd 1, Southern Ireland            |
|               | 895              | 11/05/12        | Negative                        | Herd 1, Southern Ireland            |
|               | 530              | 10/05/12        | Negative                        | Herd 1, Southern Ireland            |
|               | 840              | 14/05/12        | Negative                        | Herd 1, Southern Ireland            |
|               | 693              | 14/05/12        | Negative                        | Herd 1, Southern Ireland            |
|               | 899              | 14/05/12        | Negative                        | Herd 1, Southern Ireland            |
| <b>897</b>    | <b>14/05/12</b>  | <b>Positive</b> | <b>Herd 1, Southern Ireland</b> |                                     |

|              |                  |                 |                          |                                 |
|--------------|------------------|-----------------|--------------------------|---------------------------------|
|              | 779              | 14/05/12        | Negative                 | Herd 1, Southern Ireland        |
|              | 942              | 14/05/12        | Negative                 | Herd 1, Southern Ireland        |
| Bovine urine | 887              | 19/04/12        | Negative                 | Herd 1, Southern Ireland        |
|              | 874              | 19/04/12        | Negative                 | Herd 1, Southern Ireland        |
|              | 905              | 19/04/12        | Negative                 | Herd 1, Southern Ireland        |
|              | 673              | 23/04/12        | Negative                 | Herd 1, Southern Ireland        |
|              | 604              | 23/04/12        | Negative                 | Herd 1, Southern Ireland        |
|              | 143              | 23/04/12        | Negative                 | Herd 1, Southern Ireland        |
|              | 768              | 02/05/12        | Negative                 | Herd 1, Southern Ireland        |
|              | 960              | 02/05/12        | Negative                 | Herd 1, Southern Ireland        |
|              | 889              | 02/05/12        | Negative                 | Herd 1, Southern Ireland        |
|              | 800              | 02/05/12        | Negative                 | Herd 1, Southern Ireland        |
|              | 972              | 02/05/12        | Negative                 | Herd 1, Southern Ireland        |
|              | 845              | 02/05/12        | Negative                 | Herd 1, Southern Ireland        |
|              | 806 <sup>a</sup> | 09/05/12        | PCR Inhibited            | Herd 1, Southern Ireland        |
|              | 897              | 09/05/12        | Negative                 | Herd 1, Southern Ireland        |
|              | 966 <sup>a</sup> | 09/05/12        | PCR Inhibited            | Herd 1, Southern Ireland        |
|              | 866              | 15/05/12        | Negative                 | Herd 1, Southern Ireland        |
|              | 530              | 17/05/12        | Negative                 | Herd 1, Southern Ireland        |
|              | 906              | 17/05/12        | Negative                 | Herd 1, Southern Ireland        |
|              | 602              | 17/05/12        | Negative                 | Herd 1, Southern Ireland        |
|              | 462              | 17/05/12        | Negative                 | Herd 1, Southern Ireland        |
| 731          | 17/05/12         | Negative        | Herd 1, Southern Ireland |                                 |
| 899          | 17/05/12         | Negative        | Herd 1, Southern Ireland |                                 |
| Bovine milk  | 887              | 19/04/12        | Negative                 | Herd 1, Southern Ireland        |
|              | 693              | 19/04/12        | Negative                 | Herd 1, Southern Ireland        |
|              | 905              | 19/04/12        | Negative                 | Herd 1, Southern Ireland        |
|              | 805              | 19/04/12        | Negative                 | Herd 1, Southern Ireland        |
|              | 771 <sup>b</sup> | 25/04/12        | Negative                 | Herd 1, Southern Ireland        |
|              | 505 <sup>b</sup> | 25/04/12        | Negative                 | Herd 1, Southern Ireland        |
|              | 178              | 25/04/12        | Negative                 | Herd 1, Southern Ireland        |
|              | 830              | 25/04/12        | Negative                 | Herd 1, Southern Ireland        |
|              | 709              | 25/04/12        | Negative                 | Herd 1, Southern Ireland        |
|              | <b>642</b>       | <b>25/04/12</b> | <b>Positive</b>          | <b>Herd 1, Southern Ireland</b> |
|              | <b>942</b>       | <b>30/04/12</b> | <b>Positive</b>          | <b>Herd 1, Southern Ireland</b> |
|              | <b>344</b>       | <b>30/04/12</b> | <b>Positive</b>          | <b>Herd 1, Southern Ireland</b> |
|              | 800              | 30/04/12        | Negative                 | Herd 1, Southern Ireland        |
|              | 841              | 30/04/12        | Negative                 | Herd 1, Southern Ireland        |
|              | 596              | 30/04/12        | Negative                 | Herd 1, Southern Ireland        |
|              | <b>960</b>       | <b>30/04/12</b> | <b>Positive</b>          | <b>Herd 1, Southern Ireland</b> |
|              | 555              | 30/04/12        | Negative                 | Herd 1, Southern Ireland        |
|              | 426              | 03/05/12        | Negative                 | Herd 2, Southern Ireland        |

|            |                 |                 |                                 |
|------------|-----------------|-----------------|---------------------------------|
| 415        | 03/05/12        | Negative        | Herd 2, Southern Ireland        |
| 294        | 03/05/12        | Negative        | Herd 2, Southern Ireland        |
| 219        | 03/05/12        | Negative        | Herd 2, Southern Ireland        |
| 384        | 03/05/12        | Negative        | Herd 2, Southern Ireland        |
| 162        | 03/05/12        | Negative        | Herd 2, Southern Ireland        |
| <b>491</b> | <b>03/05/12</b> | <b>Positive</b> | <b>Herd 2, Southern Ireland</b> |
| 351        | 03/05/12        | Negative        | Herd 2, Southern Ireland        |
| 368        | 03/05/12        | Negative        | Herd 2, Southern Ireland        |
| 341        | 03/05/12        | Negative        | Herd 2, Southern Ireland        |
| 619        | 08/05/12        | Negative        | Herd 1, Southern Ireland        |
| 897        | 08/05/12        | Negative        | Herd 1, Southern Ireland        |
| 866        | 08/05/12        | Negative        | Herd 1, Southern Ireland        |
| 576        | 08/05/12        | Negative        | Herd 1, Southern Ireland        |
| 713        | 08/05/12        | Negative        | Herd 1, Southern Ireland        |
| 797        | 08/05/12        | Negative        | Herd 1, Southern Ireland        |
| 941        | 08/05/12        | Negative        | Herd 1, Southern Ireland        |
| 311        | 10/05/12        | Negative        | Herd 2, Southern Ireland        |
| 418        | 10/05/12        | Negative        | Herd 2, Southern Ireland        |
| 150        | 10/05/12        | Negative        | Herd 2, Southern Ireland        |
| 278        | 10/05/12        | Negative        | Herd 2, Southern Ireland        |
| 369        | 10/05/12        | Negative        | Herd 2, Southern Ireland        |
| <b>216</b> | <b>10/05/12</b> | <b>Positive</b> | <b>Herd 2, Southern Ireland</b> |
| 284        | 10/05/12        | Negative        | Herd 2, Southern Ireland        |
| 322        | 10/05/12        | Negative        | Herd 2, Southern Ireland        |
| 899        | 17/05/12        | Negative        | Herd 1, Southern Ireland        |
| 296        | 17/05/12        | Negative        | Herd 2, Southern Ireland        |
| 314        | 17/05/12        | Negative        | Herd 2, Southern Ireland        |
| 487        | 17/05/12        | Negative        | Herd 2, Southern Ireland        |

<sup>a</sup> IAC was inhibited even after re-extraction, therefore the sample was excluded from the study.

<sup>b</sup> IAC was inhibited initially, but valid after re-extraction.
